# Supplementary material for: Insights into Association of the NuRD Complex with FOG-1 from the Crystal Structure of an RbAp48·FOG-1 Complex
Source: PubMed Central journal article supplement — J Biol Chem. 2010 Nov 2;286(2):1196–203. doi: 10.1074/jbc.M110.195842 (PMC3020727; doi:10.1074/jbc.m110.195842), 2010-11-02

**Supplementary Figure 1.** Background corrected sensograms (blue) showing association (time 0–120 s) and dissociation (time 120–240 s) events following injection of increasing concentrations of RbAp48 (10, 25, 50, 100, 250, 500, 1000, 2500 and 5000 nM) onto a streptavidin-coated chip with immobilized biotinylated FOG-1(1-15) peptide. BIAevaluation fits (black) using a 1:1 binding model with drifting baseline are also shown. The  $K_a$  determined from the fit was  $(1.36 \pm 0.07) \times 10^6 \text{ M}^{-1}$  ( $\chi^2 = 10.8$ ).

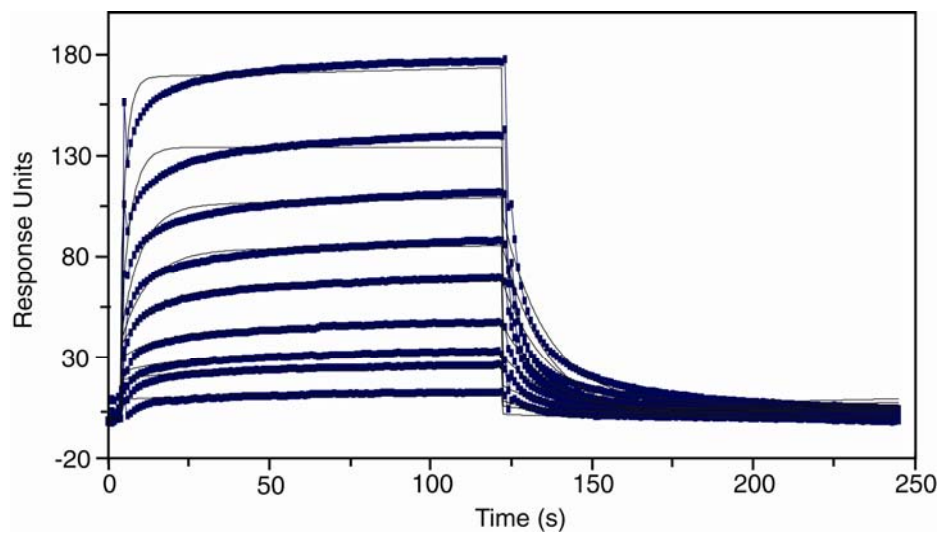

Supplement: supp_M110.195842_jbc.M110.195842-1.pdf [file supp_M110.195842_jbc.M110.195842-1.pdf]
